# Supplementary material
Source: ML conference proceedings conference paper supplement (https://openaccess.thecvf.com/content/CVPR2023/html/Eisenmann_Why_Is_the_CVPR_2023_paper.html)
Supplement: Supplementary file 1 [file Eisenmann_Why_Is_the_CVPR_2023_supplemental.pdf]

# Supplementary Material

Why is the winner the best? - Eisenmann *et al.*

## A. Conferences

Table A. Overview of conferences included in this meta-study. The conferences link to the respective conference websites. The websites were last accessed on 2022-11-11.

| # | ID | Conference                     | Conference date         | Conference full name                                                                        |
|---|----|--------------------------------|-------------------------|---------------------------------------------------------------------------------------------|
| 1 | I  | <a href="#">IEEE ISBI 2021</a> | 2021-04-13 - 2021-04-16 | 18th International Symposium on Biomedical Imaging                                          |
| 2 | M  | <a href="#">MICCAI 2021</a>    | 2021-09-27 - 2021-10-01 | 24th International Conference on Medical Image Computing and Computer Assisted Intervention |

## B. Challenges

Table B. Overview of biomedical challenges included in this meta-study. The challenge acronyms link to the respective challenge websites. The websites were last accessed on 2022-11-11.

| #  | ID   | Conference     | Challenge acronym            | Challenge full name                                                                           |
|----|------|----------------|------------------------------|-----------------------------------------------------------------------------------------------|
| 1  | I.1  | IEEE ISBI 2021 | <a href="#">CTC</a>          | 6th ISBI Cell Tracking Challenge                                                              |
| 2  | I.2  | IEEE ISBI 2021 | <a href="#">MitoEM</a>       | Large-scale 3D Mitochondria Instance Segmentation Challenge                                   |
| 3  | I.3  | IEEE ISBI 2021 | <a href="#">EndoCV2021</a>   | Addressing generalisability in polyp detection and segmentation challenge                     |
| 4  | I.4  | IEEE ISBI 2021 | <a href="#">RIADD</a>        | Retinal Image Analysis for multi-Disease Detection Challenge                                  |
| 5  | I.5  | IEEE ISBI 2021 | <a href="#">SegPC-2021</a>   | Segmentation of Multiple Myeloma Plasma Cells in Microscopic Images Challenge                 |
| 6  | I.6  | IEEE ISBI 2021 | <a href="#">A-AFMA</a>       | Ultrasound Challenge: Automatic amniotic fluid measurement and analysis from ultrasound video |
| 7  | M.1  | MICCAI 2021    | <a href="#">KiTS21</a>       | 2021 Kidney and Kidney Tumor Segmentation                                                     |
| 8  | M.2  | MICCAI 2021    | <a href="#">RealNoiseMRI</a> | Brain MRI reconstruction challenge with realistic noise                                       |
| 9  | M.3  | MICCAI 2021    | <a href="#">crossMoDA</a>    | Cross-Modality Domain Adaptation for Medical Image Segmentation                               |
| 10 | M.4  | MICCAI 2021    | <a href="#">AdaptOR 2021</a> | Deep Generative Model Challenge for Domain Adaptation in Surgery 2021                         |
| 11 | M.5  | MICCAI 2021    | <a href="#">DFUC 2021</a>    | Diabetic Foot Ulcer Challenge 2021                                                            |
| 12 | M.6a | MICCAI 2021    | <a href="#">HeiSurf</a>      | Endoscopic Vision Challenge 2021 - HeiChole Surgical Workflow Analysis and Full Scene         |

|    |      |             |                                   |                                                                                                                                |
|----|------|-------------|-----------------------------------|--------------------------------------------------------------------------------------------------------------------------------|
|    |      |             |                                   | Segmentation                                                                                                                   |
| 13 | M.6b | MICCAI 2021 | <a href="#">GIANA</a>             | Endoscopic Vision Challenge 2021 - Gastrointestinal Image ANALysis                                                             |
| 14 | M.6c | MICCAI 2021 | <a href="#">CholecTriplet2021</a> | Endoscopic Vision Challenge 2021 - Surgical Action Triplet Recognition                                                         |
| 15 | M.6d | MICCAI 2021 | <a href="#">FetReg</a>            | Endoscopic Vision Challenge 2021 - Placental Vessel Segmentation and Registration in Fetoscopy                                 |
| 16 | M.6e | MICCAI 2021 | <a href="#">PETRAW</a>            | Endoscopic Vision Challenge 2021 - PEg TRAnsfer Workflow recognition by different modalities                                   |
| 17 | M.6f | MICCAI 2021 | <a href="#">SimSurgSkill</a>      | Endoscopic Vision Challenge 2021 - Objective Surgical Skill Assessment in VR Simulation                                        |
| 18 | M.7  | MICCAI 2021 | <a href="#">DiSCo</a>             | Diffusion-Simulated Connectivity Challenge                                                                                     |
| 19 | M.8  | MICCAI 2021 | <a href="#">FLARE21</a>           | Fast and Low GPU Memory Abdominal Organ Segmentation in CT                                                                     |
| 20 | M.9  | MICCAI 2021 | <a href="#">FeTS</a>              | Federated Tumor Segmentation Challenge                                                                                         |
| 21 | M.10 | MICCAI 2021 | <a href="#">FeTA</a>              | Fetal Brain Tissue Annotation and Segmentation Challenge                                                                       |
| 22 | M.11 | MICCAI 2021 | <a href="#">HECKTOR</a>           | HEAd and neCK TumOR segmentation and outcome prediction in PET/CT images                                                       |
| 23 | M.12 | MICCAI 2021 | <a href="#">LEARN2REG</a>         | Learn2Reg - The Challenge (2021)                                                                                               |
| 24 | M.13 | MICCAI 2021 | <a href="#">MOOD</a>              | Medical Out-of-Distribution Analysis Challenge 2021                                                                            |
| 25 | M.14 | MICCAI 2021 | <a href="#">MIDOG</a>             | MItosis DObain Generalization Challenge 2021                                                                                   |
| 26 | M.15 | MICCAI 2021 | <a href="#">M&amp;Ms-2</a>        | Multi-Disease, Multi-View & Multi-Center Right Ventricular Segmentation in Cardiac MRI                                         |
| 27 | M.16 | MICCAI 2021 | <a href="#">QUBIQ 2021</a>        | Quantification of Uncertainties in Biomedical Image Quantification 2021                                                        |
| 28 | M.17 | MICCAI 2021 | <a href="#">BraTS2021</a>         | RSNA/ASNR/MICCAI Brain Tumor Segmentation Challenge 2021                                                                       |
| 29 | M.18 | MICCAI 2021 | <a href="#">SARAS-MESAD</a>       | SARAS challenge for Multi-domain Endoscopic Surgeon Action Detection                                                           |
| 30 | M.19 | MICCAI 2021 | <a href="#">AutoImplant 2021</a>  | Towards the Automatization of Cranial Implant Design in Cranioplasty: 2nd MICCAI Challenge on Automatic Cranial Implant Design |
| 31 | M.20 | MICCAI 2021 | <a href="#">VALDO</a>             | VAscular Lesions DetectiOn Challenge                                                                                           |
| 32 | M.21 | MICCAI 2021 | <a href="#">VWS</a>               | Carotid Artery Vessel Wall Segmentation Challenge                                                                              |
| 33 | M.22 | MICCAI 2021 | <a href="#">FU-Seg</a>            | Foot Ulcer Segmentation Challenge 2021                                                                                         |
| 34 | M.23 | MICCAI 2021 | <a href="#">MSSEG-2</a>           | Multiple sclerosis new lesions segmentation challenge                                                                          |
| 35 | M.24 | MICCAI 2021 | <a href="#">PAIP2021</a>          | Perineural Invasion in Multiple Organ Cancer (Colon, Prostate, and Pancreatobiliary tract)                                     |

## C. Competitions

Table C. Overview of competitions included in this meta-study.

| #  | ID     | Conference     | Challenge  | Competition                                                                   |
|----|--------|----------------|------------|-------------------------------------------------------------------------------|
| 1  | I.1.1  | IEEE ISBI 2021 | CTC        | Primary Track (evaluation across 13 datasets)                                 |
| 2  | I.1.2  | IEEE ISBI 2021 | CTC        | Secondary Track - Dataset "DIC-C2DH-HeLa"                                     |
| 3  | I.1.3  | IEEE ISBI 2021 | CTC        | Secondary Track - Dataset "Fluo-C2DL-MSD"                                     |
| 4  | I.1.4  | IEEE ISBI 2021 | CTC        | Secondary Track - Dataset "Fluo-C3DH-H157"                                    |
| 5  | I.1.5  | IEEE ISBI 2021 | CTC        | Secondary Track - Dataset "Fluo-C3DL-MDA231"                                  |
| 6  | I.1.6  | IEEE ISBI 2021 | CTC        | Secondary Track - Dataset "Fluo-N2DH-GOWT1"                                   |
| 7  | I.1.7  | IEEE ISBI 2021 | CTC        | Secondary Track - Dataset "Fluo-N2DL-HeLa"                                    |
| 8  | I.1.8  | IEEE ISBI 2021 | CTC        | Secondary Track - Dataset "Fluo-N3DH-CE"                                      |
| 9  | I.1.9  | IEEE ISBI 2021 | CTC        | Secondary Track - Dataset "Fluo-N3DH-CHO"                                     |
| 10 | I.1.10 | IEEE ISBI 2021 | CTC        | Secondary Track - Dataset "Fluo-N3DL-DRO"                                     |
| 11 | I.1.11 | IEEE ISBI 2021 | CTC        | Secondary Track - Dataset "PhC-C2DH-U373"                                     |
| 12 | I.1.12 | IEEE ISBI 2021 | CTC        | Secondary Track - Dataset "PhC-C2DL-PSC"                                      |
| 13 | I.1.13 | IEEE ISBI 2021 | CTC        | Secondary Track - Dataset "Fluo-N2DH-SIM+"                                    |
| 14 | I.1.14 | IEEE ISBI 2021 | CTC        | Secondary Track - Dataset "Fluo-N3DH-SIM+"                                    |
| 15 | I.1.15 | IEEE ISBI 2021 | CTC        | Secondary Track - Dataset "BF-C2DL-HSC"                                       |
| 16 | I.1.16 | IEEE ISBI 2021 | CTC        | Secondary Track - Dataset "BF-C2DL-MuSC"                                      |
| 17 | I.1.17 | IEEE ISBI 2021 | CTC        | Secondary Track - Dataset "Fluo-C2DL-Huh7"                                    |
| 18 | I.1.18 | IEEE ISBI 2021 | CTC        | Secondary Track - Dataset "Fluo-C3DH-A549"                                    |
| 19 | I.1.19 | IEEE ISBI 2021 | CTC        | Secondary Track - Dataset "Fluo-N3DL-TRIC"                                    |
| 20 | I.1.20 | IEEE ISBI 2021 | CTC        | Secondary Track - Dataset "Fluo-N3DL-TRIF"                                    |
| 21 | I.1.21 | IEEE ISBI 2021 | CTC        | Secondary Track - Dataset "Fluo-C3Dh-A549-SIM"                                |
| 22 | I.2.1  | IEEE ISBI 2021 | MitoEM     | 3D Mitochondria Instance Segmentation                                         |
| 23 | I.3.1  | IEEE ISBI 2021 | EndoCV2021 | Assessing generalisability in polyp detection                                 |
| 24 | I.3.2  | IEEE ISBI 2021 | EndoCV2021 | Assessing generalisability in polyp segmentation                              |
| 25 | I.4.1  | IEEE ISBI 2021 | RIADD      | Disease Screening                                                             |
| 26 | I.4.2  | IEEE ISBI 2021 | RIADD      | Disease Classification                                                        |
| 27 | I.5.1  | IEEE ISBI 2021 | SegPC-2021 | Segmentation of Multiple Myeloma Plasma Cells in Microscopic Images Challenge |
| 28 | I.6.1  | IEEE ISBI 2021 | A-AFMA     | Detection: Automatic amniotic fluid detection from                            |

|    |        |                |                   |                                                                                  |
|----|--------|----------------|-------------------|----------------------------------------------------------------------------------|
|    |        |                |                   | ultrasound video                                                                 |
| 29 | I.6.2  | IEEE ISBI 2021 | A-AFMA            | Localization: Automatic amniotic fluid measurement from ultrasound video         |
| 30 | M.1.1  | MICCAI 2021    | KiTS21            | Segmentation of Kidney and Associated Structures                                 |
| 31 | M.2.1  | MICCAI 2021    | RealNoiseMRI      | Reconstruction of motion corrupted T1 weighted MRI data                          |
| 32 | M.2.2  | MICCAI 2021    | RealNoiseMRI      | Reconstruction of motion corrupted T2 weighted MRI data                          |
| 33 | M.3.1  | MICCAI 2021    | crossMoDA         | Vestibular Schwannoma and Cochlea Segmentation                                   |
| 34 | M.4.1  | MICCAI 2021    | AdaptOR 2021      | Domain Adaptation for Landmark Detection                                         |
| 35 | M.5.1  | MICCAI 2021    | DFUC 2021         | Analysis Towards Classification of Infection & Ischaemia of Diabetic Foot Ulcers |
| 36 | M.6a.1 | MICCAI 2021    | HeiSurf           | Scene segmentation                                                               |
| 37 | M.6a.2 | MICCAI 2021    | HeiSurf           | Phase segmentation                                                               |
| 38 | M.6a.3 | MICCAI 2021    | HeiSurf           | Instrument presence                                                              |
| 39 | M.6a.4 | MICCAI 2021    | HeiSurf           | Action recognition                                                               |
| 40 | M.6b.1 | MICCAI 2021    | GIANA             | Polyp detection in colonoscopy images                                            |
| 41 | M.6b.2 | MICCAI 2021    | GIANA             | Polyp segmentation in colonoscopy images                                         |
| 42 | M.6b.3 | MICCAI 2021    | GIANA             | Histology prediction                                                             |
| 43 | M.6c.1 | MICCAI 2021    | CholecTriplet2021 | Surgical Action Triplet Recognition                                              |
| 44 | M.6d.1 | MICCAI 2021    | FetReg            | Placental semantic segmentation                                                  |
| 45 | M.6d.2 | MICCAI 2021    | FetReg            | Placental RGB frame registration for mosaicking                                  |
| 46 | M.6e.1 | MICCAI 2021    | PETRAW            | Video-based surgical workflow recognition                                        |
| 47 | M.6e.2 | MICCAI 2021    | PETRAW            | Kinematic-based surgical workflow recognition                                    |
| 48 | M.6e.3 | MICCAI 2021    | PETRAW            | Segmentation-based surgical workflow recognition                                 |
| 49 | M.6e.4 | MICCAI 2021    | PETRAW            | Video and kinematic-based surgical workflow recognition                          |
| 50 | M.6e.5 | MICCAI 2021    | PETRAW            | Video, kinematic and segmentation-based surgical workflow recognition            |
| 51 | M.6f.1 | MICCAI 2021    | SimSurgSkill      | Surgical tool/needle detection                                                   |
| 52 | M.6f.2 | MICCAI 2021    | SimSurgSkill      | Skill Assessment                                                                 |
| 53 | M.7.1  | MICCAI 2021    | DiSCo             | Quantitative connectivity estimation                                             |
| 54 | M.8.1  | MICCAI 2021    | FLARE21           | Abdominal Organ Segmentation in CT Images                                        |
| 55 | M.9.1  | MICCAI 2021    | FeTS              | Federated Training                                                               |

|    |        |             |                  |                                                                        |
|----|--------|-------------|------------------|------------------------------------------------------------------------|
| 56 | M.9.2  | MICCAI 2021 | FeTS             | Federated Evaluation                                                   |
| 57 | M.10.1 | MICCAI 2021 | FeTA             | Fetal Brain Tissue Segmentation                                        |
| 58 | M.11.1 | MICCAI 2021 | HECKTOR          | Tumor segmentation                                                     |
| 59 | M.11.2 | MICCAI 2021 | HECKTOR          | Radiomics                                                              |
| 60 | M.11.3 | MICCAI 2021 | HECKTOR          | Radiomics with ground truth contour                                    |
| 61 | M.12.1 | MICCAI 2021 | LEARN2REG        | Intra-patient multimodal abdominal MRI and CT registration             |
| 62 | M.12.2 | MICCAI 2021 | LEARN2REG        | Intra-patient large deformation lung CT registration                   |
| 63 | M.12.3 | MICCAI 2021 | LEARN2REG        | Inter-patient large scale brain MRI registration                       |
| 64 | M.13.1 | MICCAI 2021 | MOOD             | Sample-level                                                           |
| 65 | M.13.2 | MICCAI 2021 | MOOD             | Pixel-level                                                            |
| 66 | M.14.1 | MICCAI 2021 | MIDOG            | Mitotic figure detection                                               |
| 67 | M.15.1 | MICCAI 2021 | M&Ms-2           | Segmentation of the right ventricle (RV) in cardiac MRI                |
| 68 | M.16.1 | MICCAI 2021 | QUBIQ 2021       | Quantifying segmentation uncertainties                                 |
| 69 | M.17.1 | MICCAI 2021 | BraTS2021        | Segmentation of glioblastoma in mpMRI scans                            |
| 70 | M.18.1 | MICCAI 2021 | SARAS-MESAD      | Multi-domain static action detection                                   |
| 71 | M.19.1 | MICCAI 2021 | AutoImplant 2021 | Cranial implant design for diverse synthetic defects on aligned skulls |
| 72 | M.19.2 | MICCAI 2021 | AutoImplant 2021 | Cranial implant design for real patient defects                        |
| 73 | M.19.3 | MICCAI 2021 | AutoImplant 2021 | Improving the model generalization ability for cranial implant design  |
| 74 | M.20.1 | MICCAI 2021 | VALDO            | Segmentation of enlarged PVS                                           |
| 75 | M.20.2 | MICCAI 2021 | VALDO            | Segmentation of cerebral microbleeds                                   |
| 76 | M.20.3 | MICCAI 2021 | VALDO            | Segmentation of lacunes                                                |
| 77 | M.21.1 | MICCAI 2021 | VWS              | Vessel wall segmentation                                               |
| 78 | M.22.1 | MICCAI 2021 | FU-Seg           | Foot Ulcer Segmentation                                                |
| 79 | M.23.1 | MICCAI 2021 | MSSEG-2          | New MS lesions segmentation                                            |
| 80 | M.24.1 | MICCAI 2021 | PAIP2021         | Detection of perineural invasion in three organ cancers                |

## D. Profile of a competition winner

Figure D. Profile of a competition winner. In case of categorical values, the majority vote of all participants was used (note that “unsure” was also an option where appropriate). In case of continuous values, the median was taken.

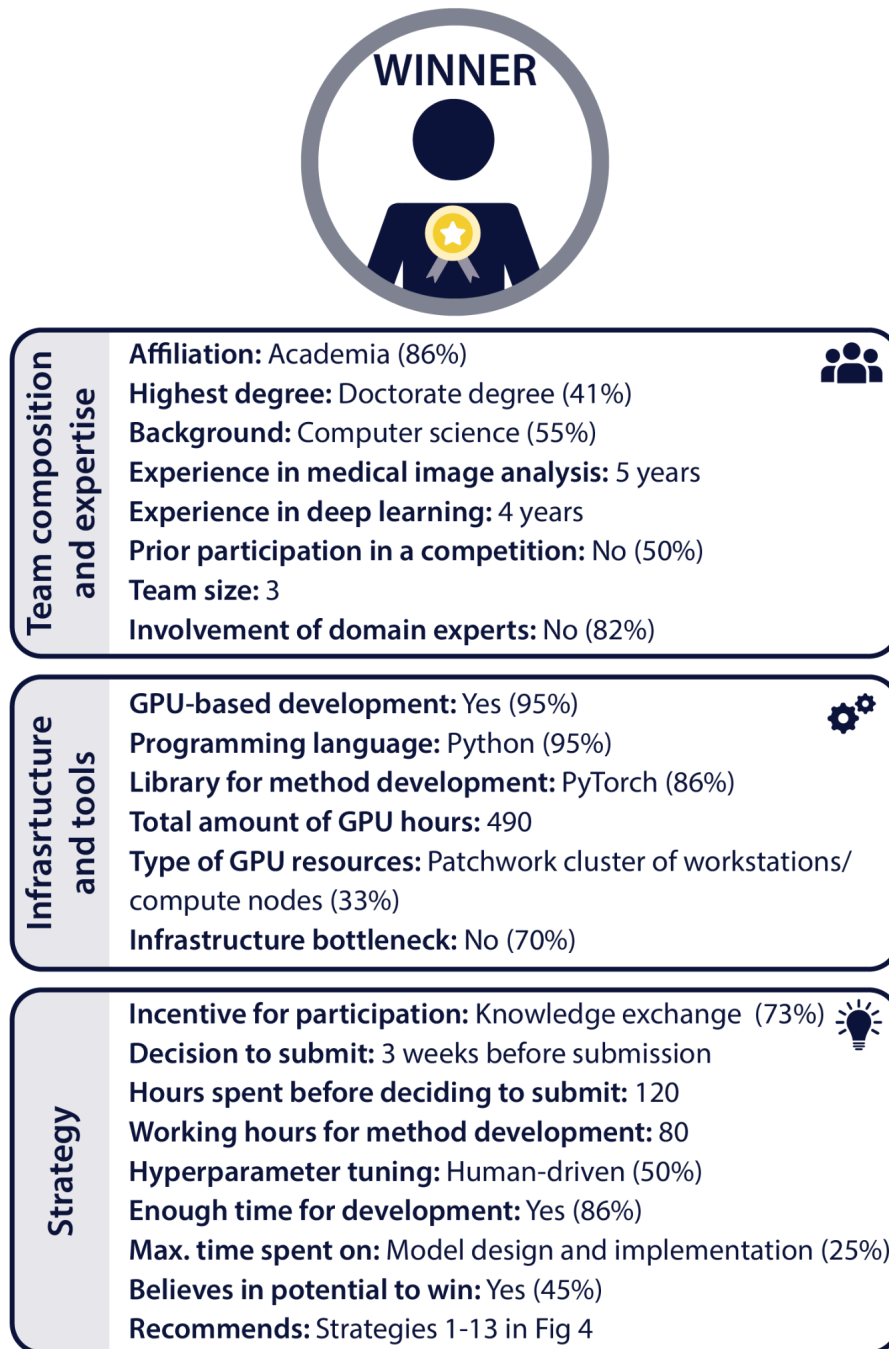

## E. Remaining challenges

The amount of tasks that were “not solved at all”/“completely solved” differed substantially across medical disciplines ranging from 0%/33% for pathology, 0%/8% for radiology, to 16%/12% for surgery, thus suggesting that specifically surgical video analysis is an open grand challenge. Some overarching open research questions extracted from our work are provided in Tab. F. We have further obtained permission from the challenge organizers to de-anonymize their answers in order to explicitly list the gaps in the literature for tasks that have not been solved (Tab. E).

Table E. Remaining challenges related to unsolved biomedical imaging tasks according to challenge organizers. The task IDs given in brackets refer to Suppl. C.

| Task                                                                                                       | Illustration                                                                        | Solved?                        | Core remaining challenges                                                                                                                                                         |
|------------------------------------------------------------------------------------------------------------|-------------------------------------------------------------------------------------|--------------------------------|-----------------------------------------------------------------------------------------------------------------------------------------------------------------------------------|
| ISBI / MitoEM (I.2.1):<br>3D mitochondria<br>instance segmentation                                         | 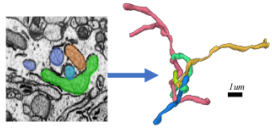   | No;<br>substantial<br>progress | Segmentation of a specific type of mitochondria (mitochondria-on-a-string); imaging artifacts such as knife marks and lighting variations.                                        |
| ISBI / SegPC-2021<br>(I.5.1): Segmentation<br>of multiple myeloma<br>plasma cells in<br>microscopic images |   | No; minor<br>progress          | Cytoplasm boundaries, which provide a poor contrast relative to background.                                                                                                       |
| ISBI / A-AFMA (I.6.1):<br>Automatic amniotic<br>fluid detection from<br>ultrasound video                   |  | No; first<br>baseline          | Lack of use of temporal context; lack of incorporation of clinical context knowledge; poor imaging conditions (e.g., artifacts).                                                  |
| ISBI / A-AFMA (I.6.2):<br>Automatic amniotic<br>fluid measurement<br>from ultrasound video                 | N/A                                                                                 | No; minor<br>progress          | Ultrasound image artifacts, e.g., acoustic shadow, unclear boundaries.                                                                                                            |
| MICCAI / KiTS21<br>(M.1.1): Segmentation<br>of kidney and<br>associated structures                         |  | No;<br>substantial<br>progress | Small cysts and tumors.                                                                                                                                                           |
| MICCAI /<br>RealNoiseMRI<br>(M.2.1):<br>Reconstruction of<br>motion corrupted T1<br>weighted MRI data      |  | No; minor<br>progress          | The challenge was focused on providing realistically degraded brain MRI to evaluate reconstruction algorithms on, and it showed that current algorithms still cannot handle this. |

|                                                                                                                         |                                                                                     |                                 |                                                                                                                                                                                          |
|-------------------------------------------------------------------------------------------------------------------------|-------------------------------------------------------------------------------------|---------------------------------|------------------------------------------------------------------------------------------------------------------------------------------------------------------------------------------|
| <p>MICCAI / RealNoiseMRI (M.2.2): Reconstruction of motion corrupted T2 weighted MRI data</p>                           | 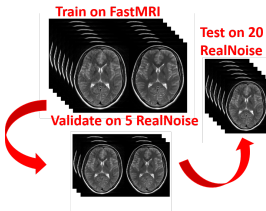   | <p>No; minor progress</p>       | <p>The challenge was focused on providing realistically degraded brain MRI to evaluate reconstruction algorithms on, and it showed that current algorithms still cannot handle this.</p> |
| <p>MICCAI / AdaptOR 2021 (M.4.1): Domain Adaptation for landmark detection</p>                                          |    | <p>Not at all</p>               | <p>Varying light conditions and non-standardized views.</p>                                                                                                                              |
| <p>MICCAI / DFUC 2021 (M.5.1): Analysis towards classification of infection &amp; ischaemia of diabetic foot ulcers</p> |    | <p>No; substantial progress</p> | <p>Data imbalance (the majority of the images are of type infection and control).</p>                                                                                                    |
| <p>MICCAI / HeiSurf (M.6a.1): Scene segmentation</p>                                                                    |   | <p>No; substantial progress</p> | <p>Smoke and motion blur, high brightness/darkness.</p>                                                                                                                                  |
| <p>MICCAI / HeiSurf (M.6a.2): Phase segmentation</p>                                                                    |  | <p>No; substantial progress</p> | <p>Complex surgeries, out-of-body frames.</p>                                                                                                                                            |
| <p>MICCAI / HeiSurf (M.6a.3): Instrument presence</p>                                                                   |  | <p>No; substantial progress</p> | <p>Occlusions, and motion blur.</p>                                                                                                                                                      |
| <p>MICCAI / HeiSurf (M.6a.4): Action recognition</p>                                                                    |  | <p>No; minor progress</p>       | <p>Poor performance on some classes.</p>                                                                                                                                                 |
| <p>MICCAI / GIANA (M.6b.3): Histology prediction</p>                                                                    | <p>N/A</p>                                                                          | <p>No; substantial progress</p> | <p>Poor performance on the rare class (adenomatous).</p>                                                                                                                                 |
| <p>MICCAI / EndoVis / CholecTriplet (M.6c.1): Surgical action recognition</p>                                           |  | <p>No; minor progress</p>       | <p>Non-intuitive data augmentation; poor performance on rare triplets and difficult imaging conditions.</p>                                                                              |



|                                                                                                        |                                                                                     |                                 |                                                                                                                                             |
|--------------------------------------------------------------------------------------------------------|-------------------------------------------------------------------------------------|---------------------------------|---------------------------------------------------------------------------------------------------------------------------------------------|
| <p>MICCAI / FetReg (M.6d.1): Placental semantic segmentation</p>                                       | 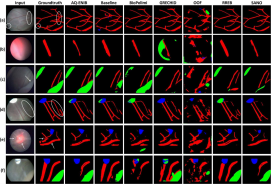   | <p>No; minor progress</p>       | <p>High variability across different centers/devices; poor visibility, varying illumination, artifacts, occlusions.</p>                     |
| <p>MICCAI / FetReg (M.6d.2): Placental RGB frame registration for mosaicking</p>                       |    | <p>Not at all</p>               | <p>Poor vessel visibility, artifacts, texture paucity, occlusions, non-planar views, non-rigid deformations (i.e., maternal breathing).</p> |
| <p>MICCAI / PETRAW (M.6e.1): Video-based surgical workflow recognition</p>                             |    | <p>No; minor progress</p>       | <p>Non-standardized workflows; the data set is highly unbalanced with respect to the action verb (some prevalences &lt; 5%).</p>            |
| <p>MICCAI / PETRAW (M.6e.2): Kinematic-based surgical workflow recognition</p>                         |  | <p>No; minor progress</p>       | <p>Non-standardized workflows; the data set is highly unbalanced with respect to the action verb (some prevalences &lt; 5%).</p>            |
| <p>MICCAI / PETRAW (M.6e.3): Segmentation-based surgical workflow recognition</p>                      |  | <p>Not at all</p>               | <p>Non-standardized workflows; the data set is highly unbalanced with respect to the action verb (some prevalences &lt; 5%).</p>            |
| <p>MICCAI / PETRAW (M.6e.4): Video and kinematic-based surgical workflow recognition</p>               |  | <p>No; minor progress</p>       | <p>The data set is highly unbalanced with respect to the action verb (some prevalences &lt; 5%).</p>                                        |
| <p>MICCAI / PETRAW (M.6e.5): Video, kinematic and segmentation-based surgical workflow recognition</p> |  | <p>No; minor progress</p>       | <p>Non-standardized workflows; the data set is highly unbalanced with respect to the action verb (some prevalences &lt; 5%).</p>            |
| <p>MICCAI / SimSurgSkill (M.6f.1): Skill Assessment</p>                                                | <p>N/A</p>                                                                          | <p>No; minor progress</p>       | <p>Change of background.</p>                                                                                                                |
| <p>MICCAI / SimSurgSkill (M.6f.2): Surgical tool/needle detection</p>                                  | <p>N/A</p>                                                                          | <p>No; substantial progress</p> | <p>Domain shifts (i.e., different background but same tools).</p>                                                                           |

|                                                                                            |                                                                                     |                             |                                                                                                                                                               |
|--------------------------------------------------------------------------------------------|-------------------------------------------------------------------------------------|-----------------------------|---------------------------------------------------------------------------------------------------------------------------------------------------------------|
| MICCAI / DiSCo<br>(M.7.1): Quantitative connectivity estimation                            | 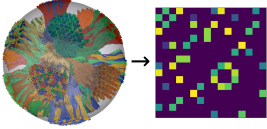   | No;<br>substantial progress | Estimation of connectivity in more complex microstructural environments; coping with various MRI noise sources and artifacts.                                 |
| MICCAI / FLARE21<br>(M.8.1): Abdominal organ segmentation in CT images                     |    | No;<br>substantial progress | The top algorithms tend to fail in the regions with low contrast, pathological changes, and fuzzy boundaries.                                                 |
| MICCAI / FeTS<br>(M.9.2): Federated evaluation                                             |    | No; minor progress          | Reference segmentations with empty enhancing tumor regions lead to extreme metric values.<br><br>Analysis of failure cases is limited by the federated setup. |
| MICCAI / FeTA<br>(M.10.1): Fetal brain tissue segmentation                                 | N/A                                                                                 | No;<br>substantial progress | Consistent performance across all five classes.                                                                                                               |
| MICCAI / HECKTOR<br>(M.11.1): Tumor segmentation                                           |  | No;<br>substantial progress | Corner cases, such as large metastatic lymph nodes incorrectly segmented as a primary tumor.                                                                  |
| MICCAI / HECKTOR<br>(M.11.2): Radiomics                                                    |  | No;<br>substantial progress | Stratifications of patient populations in terms of treatment and imaging protocols, HPV status, and age are needed.                                           |
| MICCAI / HECKTOR<br>(M.11.3): Radiomics with ground truth contours                         |  | No;<br>substantial progress | Stratifications of patient populations in terms of treatment and imaging protocols, HPV status, and age are needed.                                           |
| MICCAI / LEARN2REG<br>(M.12.1): Intra-patient multimodal abdominal MRI and CT registration | N/A                                                                                 | No;<br>substantial progress | Large deformations, large variations in voxel-size (before pre-processing), and contrast.                                                                     |
| MICCAI / MOOD<br>(M.13.1): Pixel-level                                                     |  | No; minor progress          | Medically relevant but less obvious anomalies.                                                                                                                |
| MICCAI / MOOD<br>(M.13.2): Sample-level                                                    |  | No; minor progress          | Medically relevant but less obvious anomalies.                                                                                                                |

|                                                                                                                   |                                                                                     |                                 |                                                                                                                                                                                                                                       |
|-------------------------------------------------------------------------------------------------------------------|-------------------------------------------------------------------------------------|---------------------------------|---------------------------------------------------------------------------------------------------------------------------------------------------------------------------------------------------------------------------------------|
| <p>MICCAI / SARAS-MESAD (M.18.1): Multi-domain static action detection</p>                                        | 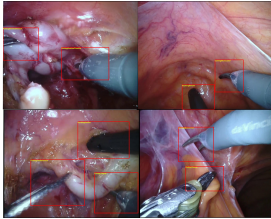   | <p>Not at all</p>               | <p>Domain shifts (i.e., large shifts in the characteristics of scenes, such as change in lighting conditions, properties of the tools, change in endoscopic camera).</p>                                                              |
| <p>MICCAI / AutoImplant 2021 (M.19.1): Cranial implant design for diverse synthetic defects on aligned skulls</p> |    | <p>No; substantial progress</p> | <p>Complex shapes in the "frontal" group of implant cases.</p>                                                                                                                                                                        |
| <p>MICCAI / AutoImplant 2021 (M.19.2): Cranial implant design for real patient defects</p>                        |    | <p>No; minor progress</p>       | <p>Big cranial defects.<br/>The given training data was strictly shape completion, but the predicted implants were evaluated against real cranial implants. This led to a mismatch in the shape of the predicted implant designs.</p> |
| <p>MICCAI / Where is VALDO (M.20.3): Segmentation of lacunes</p>                                                  |  | <p>No; minor progress</p>       | <p>Dataset representativeness, e.g., sparsity of small elements of interest with potentially large variability in shape and intensity signature.</p>                                                                                  |
| <p>MICCAI / VWS (M.21.1): Vessel wall segmentation</p>                                                            |  | <p>No; substantial progress</p> | <p>Vessel wall segmentation at the carotid bifurcation, in the presence of flow artifacts or low SNR; complex plaque.</p>                                                                                                             |

## F. Open research questions

Table F. Overarching general open research questions extracted from this work.

| Research question                                                                                                     |
|-----------------------------------------------------------------------------------------------------------------------|
| How can we better integrate clinical context data in neural network solutions?                                        |
| How can we effectively leverage temporal information in endoscopic video analysis?                                    |
| How to do data augmentation in endoscopic video analysis?                                                             |
| How can we achieve generalization across biomedical devices, protocols, and caregivers involved in image acquisition? |
| How can we arrive at performance metrics that better address the biomedical domain interest?                          |

## G. Acknowledgments

Part of this work was funded by Helmholtz Imaging, a platform of the Helmholtz Information & Data Science Incubator. S. Bakas was supported by the National Institutes of Health (NIH) award number NCI/ITCR:U01CA242871. J. Bernal acknowledges funding from MCIN/AEI/10.13039/501100011033, Grant Number: PID2020-120311RB-I00. M. de Bruijne was supported by the Netherlands Organisation for Scientific Research (NWO) project VI.C.182.042. R. Dorent received funding from the Engineering and Physical Sciences Research Council (EPSRC) [NS/A000049/1, NS/A000050/1], MRC (MC/PC/180520), Wellcome Trust [203145Z/16/Z, 203148/Z/16/Z, WT106882], and the National Institutes of Health via P41EB028741. A. Gupta acknowledges funding from Grant No. EMR/2016/006183 by SERB, Department of Science & Technology, Govt. of India. N. Heller was partially supported by the National Institutes of Health under award number R01CA225435. M. Kozubek was supported by the Czech Ministry of Education, Youth and Sports (Project LM2023050). B. Menze acknowledges funding from the Helmut Horten Stiftung. V. Singh Bawa was funded by the European Union's Horizon 2020 research and innovation programme under grant agreement No. 779813. K. van Wijnen received funding from the Dutch Technology Foundation STW, project P15-26. L. Bloch and R. Brüngel were partially funded by a PhD grant from the University of Applied Sciences and Arts Dortmund (FH Dortmund), Dortmund, Germany. I. Ezhov acknowledges funding from the TUM International Graduate School of Science and Engineering (IGSSE). A. Galdran was supported by a Marie Skłodowska-Curie Fellowship (No 892297). Á. García Faura, T. Martinčič and D. Štepec were partially supported by the European Commission through Horizon 2020 and Horizon Europe research and innovation programs under grants 826121 (iPC), 101057294 (AIDEAS) and 101073821 (SUNRISE). F. Kofler was supported through the SFB 824, subproject B12, supported by Anna Valentina Lioba Eleonora Claire Javid Mamasani, and by Deutsche Forschungsgemeinschaft (DFG) through TUM International Graduate School of Science and Engineering (IGSSE), GSC 81. P. Morais was funded by national funds, through the FCT (Fundação para a Ciência e a Tecnologia) and FCT/MCTES in the scope of the project UIDB/05549/2020 and CEECINST/00039/2021. S. Płotka was funded by the European Union's Horizon 2020 research and innovation programme under grant agreement no. 857533 (Sano) and the International Research Agendas programme of the Foundation for Polish Science, co-financed by the European Union under the European Regional Development Fund. J. L. Vilaça was partially supported by the project NORTE-01-0145-FEDER-000045 funded by the Northern Portugal Regional Operational Programme (NORTE 2020), under the Portugal 2020 Partnership Agreement, through the European Regional Development Fund (FEDER). K. A. Wahid was

supported by the National Institutes of Health (NIH) grant no. 5F31DE031502-02. H. Torres was funded by FCT, Portugal and the European Social Found, European Union, through the “Programa Operacional Capital Humano” (POCH) in the scope of the PhD grants SFRH/BD/136670. B. Oliveira was funded by FCT, Portugal and the European Social Found, European Union, through the “Programa Operacional Capital Humano” (POCH) in the scope of the PhD grant SFRH/BD/136721/2018. Nicolas Padoy and his team were supported by French state funds managed within the Investissements d’Avenir program by BPI France (project CONDOR) and by the ANR (references ANR-11-LABX-0004, ANR-16-CE33-0009 and ANR-10-IAHU-02). I. Jang was supported by Hankuk University of Foreign Studies Research Fund of 2023. A. Casella was supported by Giancarlo Ferrigno, Elena De Momi (Politecnico di Milano, Milan, Italy) and Leonardo S. Mattos (Istituto Italiano di Tecnologia, Genoa, Italy). M. Zenk was partially funded by the Helmholtz Association within the project “Trustworthy Federated Data Analytics” (TFDA) (funding number ZT-I-OO1 4).

We thank Susanne Steger (Data Protection Office, DKFZ) for the data protection supervision and Anke Trotter (IT Core Facility, DKFZ) for the hosting of the surveys.

We further thank Tony C. W. Mok (The Hong Kong University of Science and Technology, Hong Kong), Vajira Thambawita (Simula Research Laboratory, Norway), and Amirreza Mahbod (Medical University of Vienna, Austria) for taking the winner survey.

We thank Sergio Escalera Guerrero (Universitat de Barcelona and Computer Vision Center, Spain), and Karim Lekadir (Universitat de Barcelona, Spain) for supervision of challenge participants.
